# Supplementary material for: Synthesis, growth, spectral studies, first-order molecular hyperpolarizability and Hirshfeld surface analysis of isonicotinohydrazide single crystals
Source: Royal Society of Chemistry journal article supplement (doi:10.1039/c5ra08454g), 2015-01-01
Supplement: c5ra08454g1.pdf [file c5ra08454g1.pdf]

## Supporting information

### Experimental

#### *Characterization techniques*

The structural analysis of FPMI was carried out for a selected sample of approximately 0.35 x 0.30 x 0.30 mm<sup>3</sup> using a BRUKER AXS (Kappa APEXII) X-ray diffractometer. Single crystal XRD data were collected on a diffraction system that employs graphite monochromated Mo K $\alpha$  radiation ( $\lambda = 0.71073\text{\AA}$ ). The powder XRD analysis was performed using a Philips X'pert Pro Triple axis X-ray diffractometer using a wavelength of 1.540  $\text{\AA}$  with a step size of 0.008  $\text{\AA}$  and the samples were examined with Cu K $\alpha$  radiation in  $2\theta$  range of 10–50°. FT-IR spectra were recorded using a NICOLET IS5 FT-IR instrument using the KBr pellet technique in the spectral range of 650–4000 cm<sup>-1</sup> and FT-Raman spectra were recorded by BRUKER RFS 100/S Instrument. The NMR spectra were recorded on BRUCKER AVIII 400 MHz NMR spectrometer operating at 400.13 MHz for <sup>1</sup>H and 100.61 MHz for <sup>13</sup>C using standard parameters. The FPMI is dissolved in 0.5 ml of CDCl<sub>3</sub> solvent and TMS (tetramethylsilane) was used as an internal standard. Mass spectrum of FPMI was recorded on a VARIAN SATURN 2000 GC-MS/MS spectrometer using electron impact technique by dissolving about 1 mg of compound in 5 ml of spectral grade methanol. A CARY-5E UV-vis spectrophotometer was used for the UV-vis studies. Thermogravimetry and differential thermal analyses were recorded on NETZSCH STA 449F3 thermal analyzer in nitrogen atmosphere. The sample was scanned in the temperature range 20–500 °C at a rate of 10 °C min<sup>-1</sup>.

#### Supplementary Figure captions

**Fig S1.** FT-IR spectra of FPMI (a) experimental and (b) theoretical

**Fig S2.** FT-Raman spectra of FPMI.

**Fig S3.** Tauc plot of FPMI (a) direct and (b) indirect

**Fig S4.** TG-DTA spectrum of FPMI.

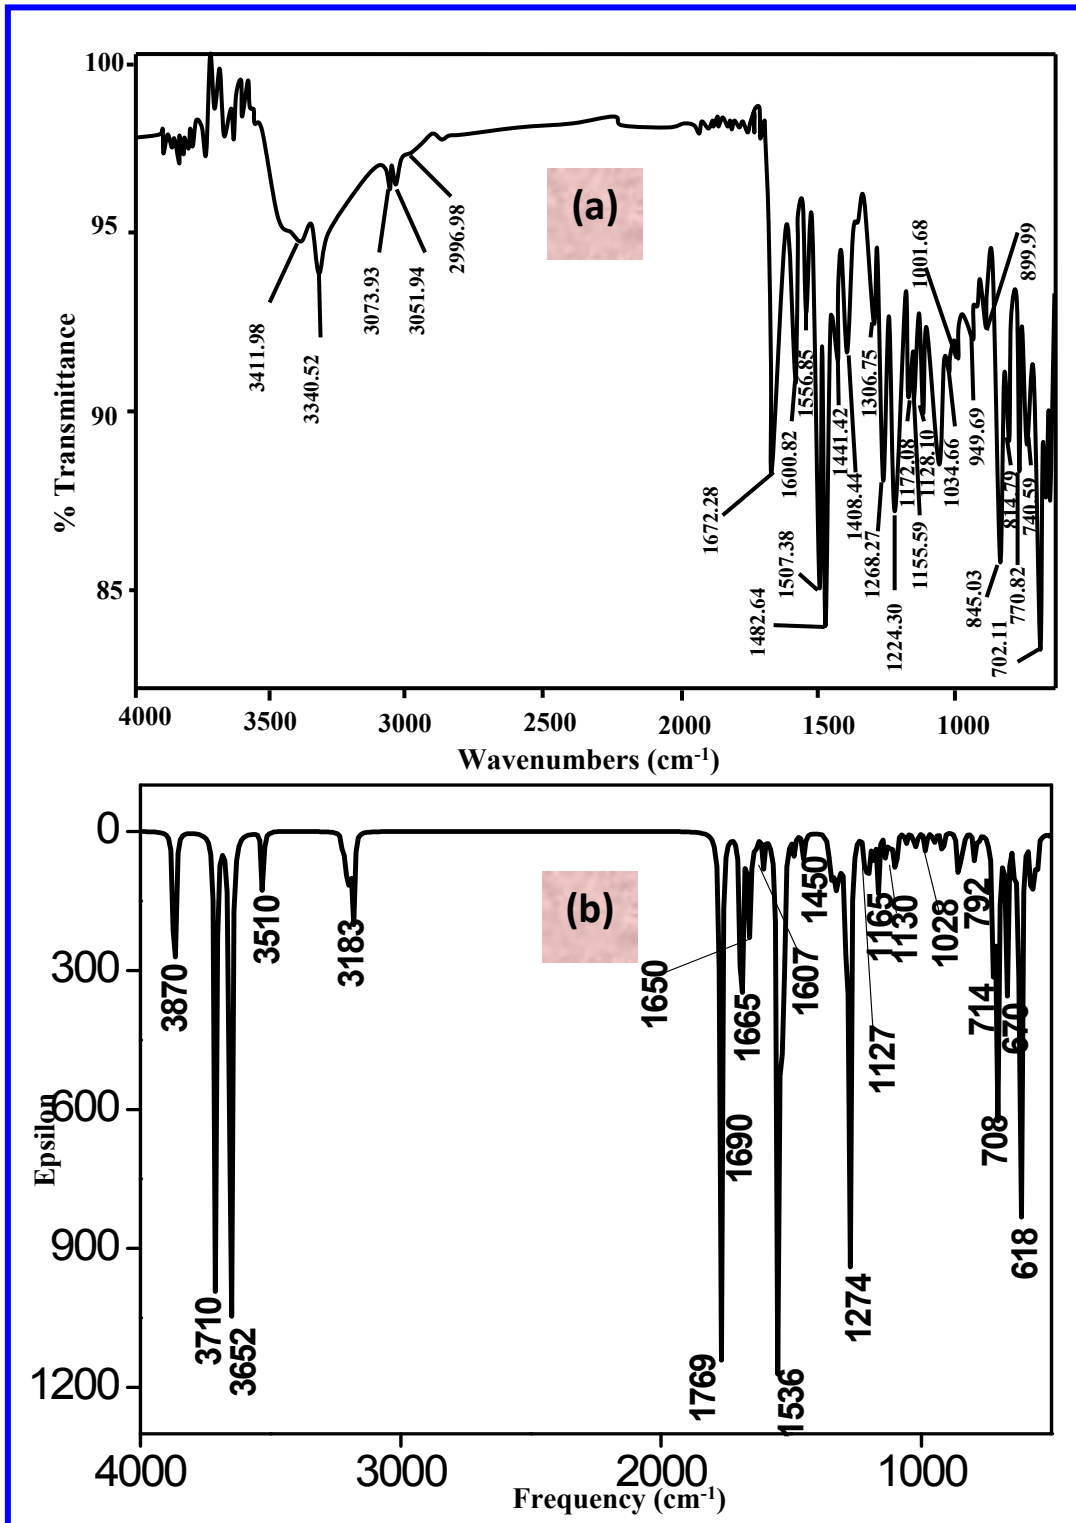

Fig. S1

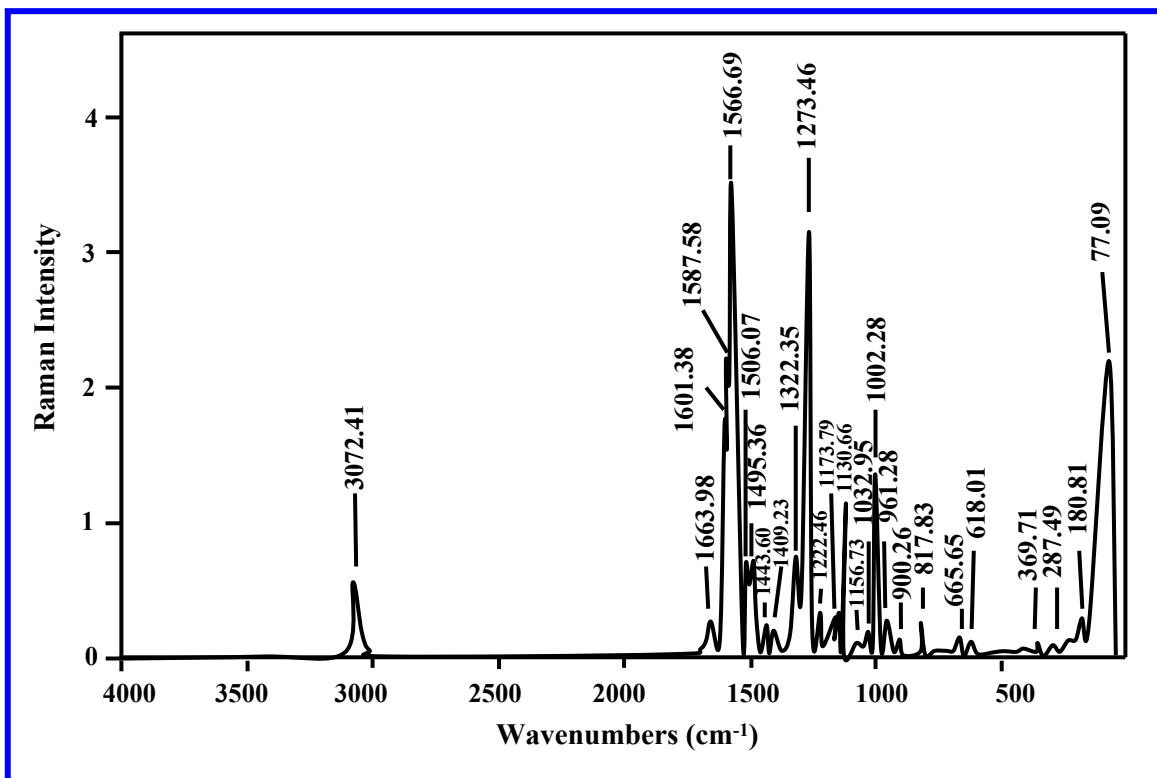

Fig. S2

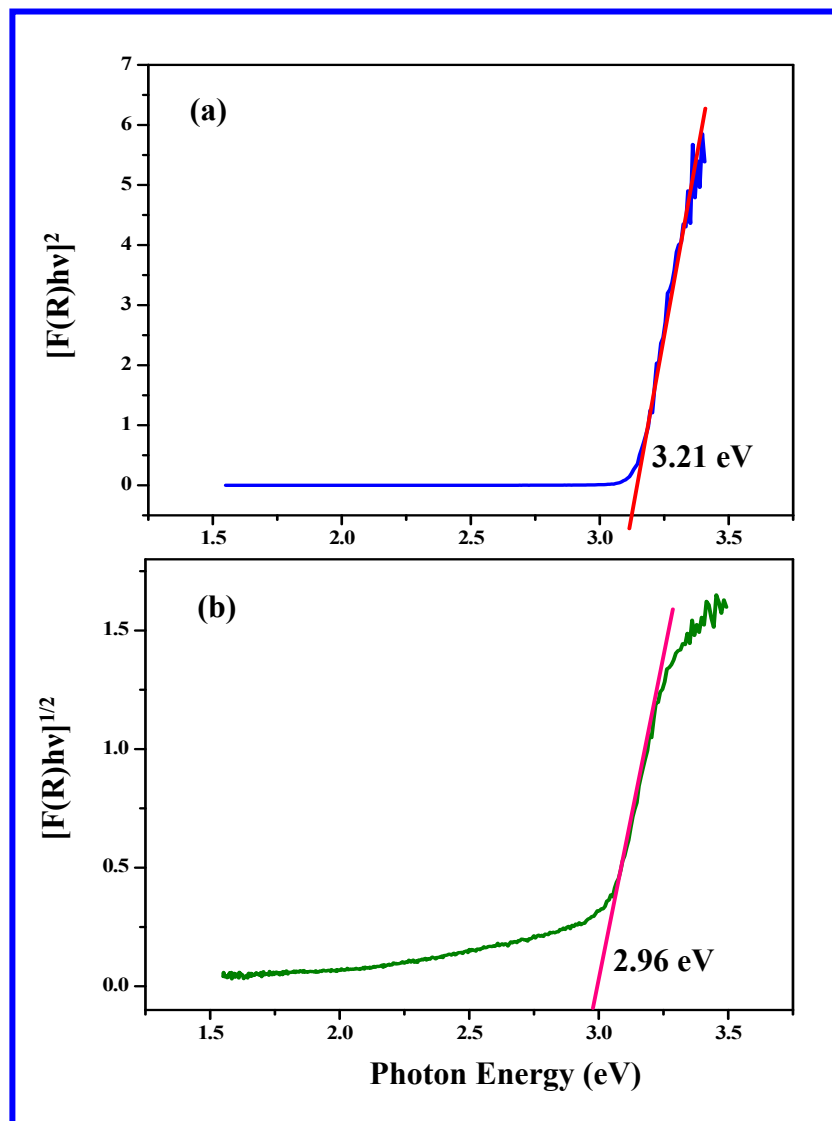

Fig. S3

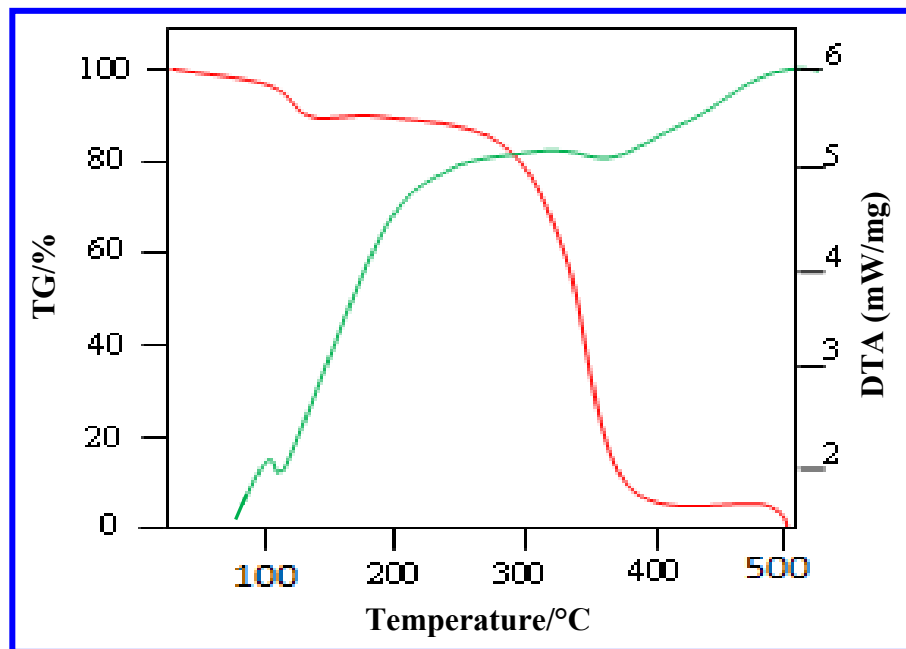

Fig. S4
